# Supplementary material for: Study on the synergistic effect of TPF phenolic curing agent and OMMT on the cured multifunctional epoxy grafted by SAP
Source: Research Square preprint supplement (doi:10.21203/rs.3.rs-8225846/v1), 2025-12-03
Supplement: Supplementary file 1 [file b14b7c3c48192e7f903232b8.docx]

**Supporting information**

**Study on the synergistic effect of TPF phenolic curing agent and OMMT on the cured multifunctional epoxy grafted by SAP**

**Zhuhuan Chen Shijie Zhang Ruobing Yu***

a School of Materials Science and Engineering, East China University of Science and Technology, Meilong Road 130#, Xuhui District, Shanghai 200237, China

* Email address: [rbyu@ecust.edu.cn](mailto:rbyu@ecust.edu.cn)

**Content**

**Table S1. Formulation for preparation of TASx and TAS10My**

**Figure S1. SEM image of impact fracture surface of the cured (a) TAS10M5, (b) TAS10M10 and (c) TAS10M15**

**Figure S2. Spline and solution changes of composite materials soaked in 98% H2SO4 and 25% NaOH for 7 days**

**Table S1** **Formulation for preparation of TASx and TAS10My**

| **Systems** | **SAP/g** | **AFG-90H/g** | **TPF/g** | **2,4-EMI/g** | **OMMT/g** |
| --- | --- | --- | --- | --- | --- |
| **TAS0** | 0 | 100 | 27.2 | 0.5 | / |
| **TAS5** | 5 | 95 | 25.8 | 0.5 | / |
| **TAS10** | 10 | 90 | 24.5 | 0.5 | / |
| **TAS15** | 15 | 85 | 23.1 | 0.5 | / |
| **TAS20** | 20 | 80 | 21.7 | 0.5 | / |
| **TAS10M5** | 10 | 90 | 24.5 | 0.5 | 5 |
| **TAS10M10** | 10 | 90 | 24.5 | 0.5 | 10 |
| **TAS10M15** | 10 | 90 | 24.5 | 0.5 | 15 |


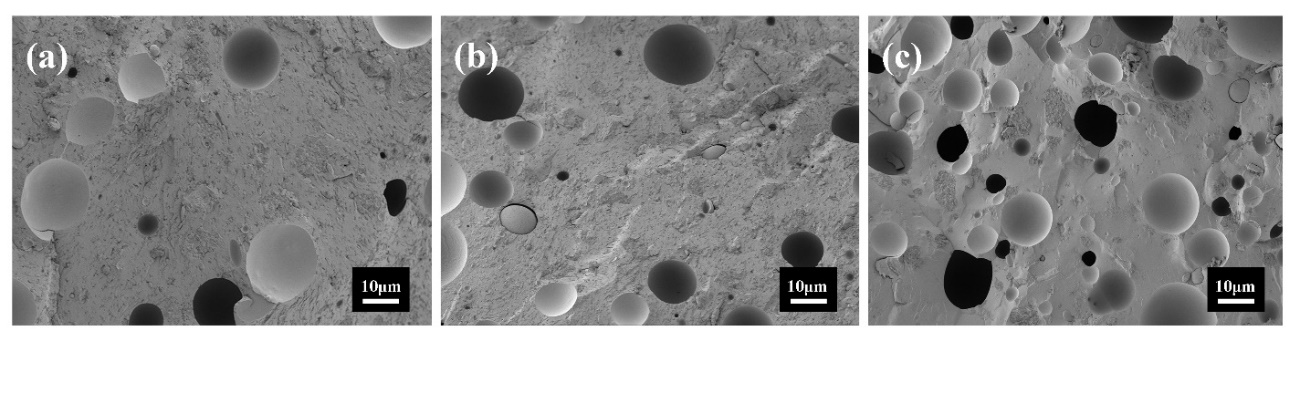


Figure S1. SEM image of impact fracture surface of the cured (a) TAS10M5, (b) TAS10M10 and (c) TAS10M15


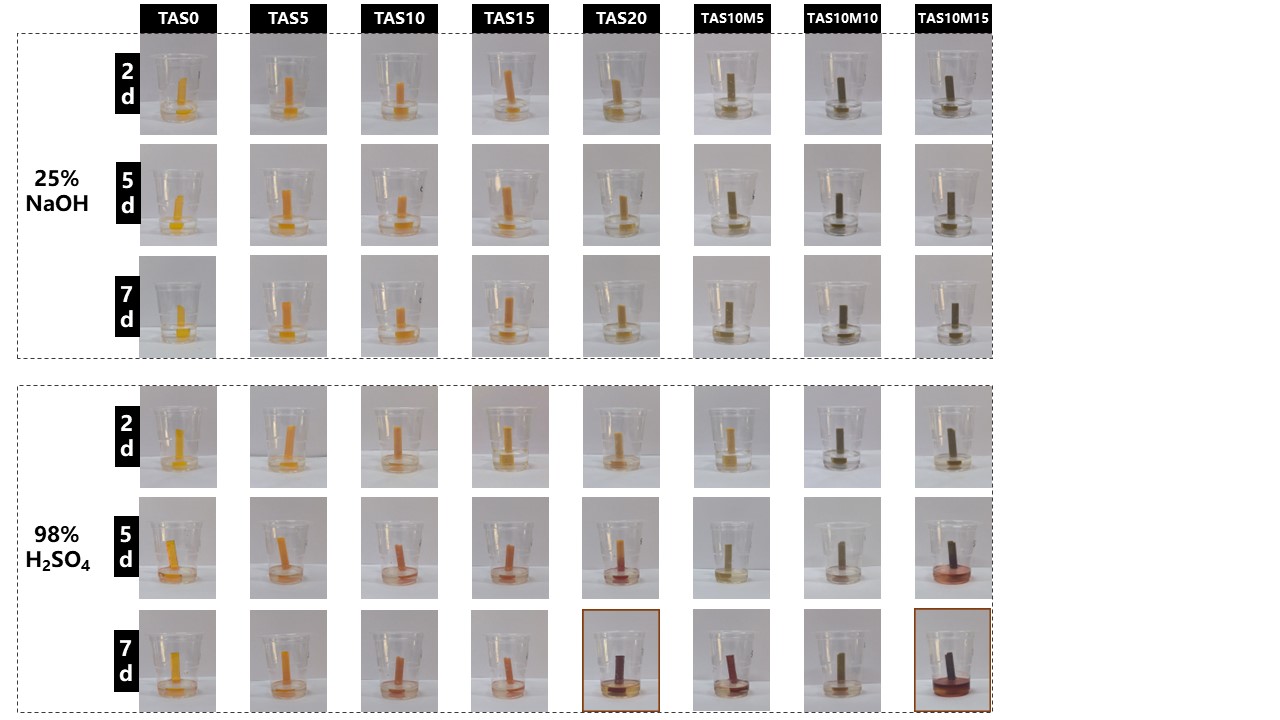


Figure S2. Spline and solution changes of composite materials soaked in 98% H2SO4 and 25% NaOH for 7 days
